# Supplementary material for: BST2 induced macrophage M2 polarization to promote the progression of colorectal cancer
Source: PubMed Central journal article supplement (PMC9760448; doi:10.7150/ijbs.72538), 2023-01-01
Supplement: ijbsv19p0331s1.pdf [file ijbsv19p0331s1.pdf]

A

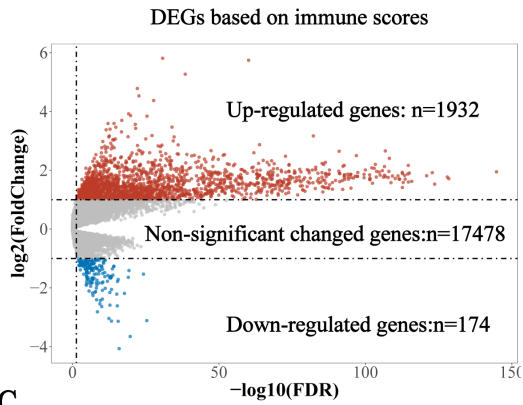

B

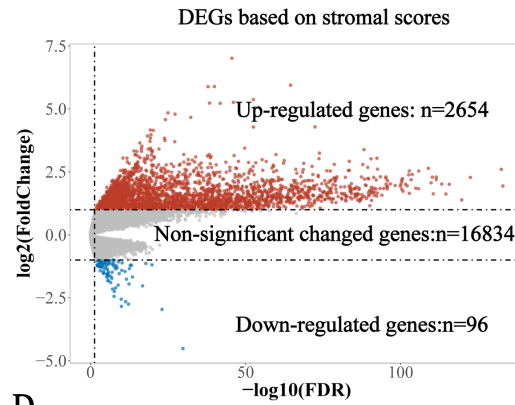

C

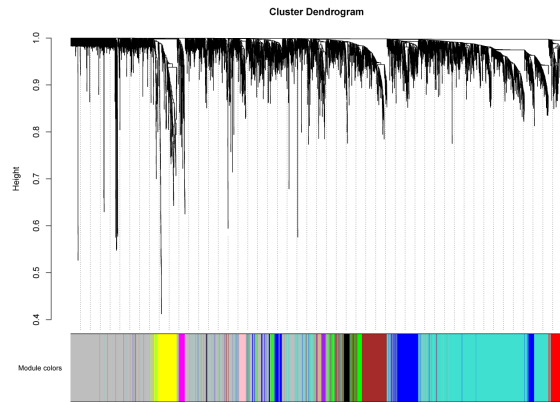

D

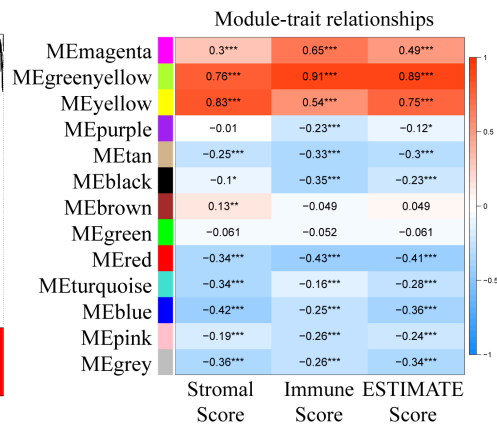

E

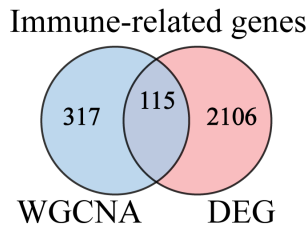

G

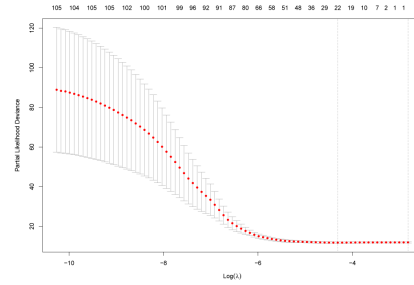

Output:

ACP5 BGN **BST2** C1QA C1QB  
 CHI3L1 COL6A1 CTSK CYBB  
 DCN FBLN2 IFI16 MMP1 MXRA5  
 OAS2 SERPINE1 SPP1 STAB1  
 TNC TNFAIP2 UBE2L6 WARS1

F

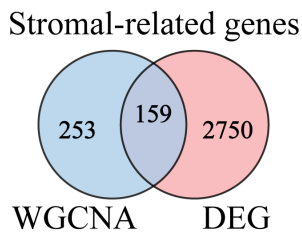

H

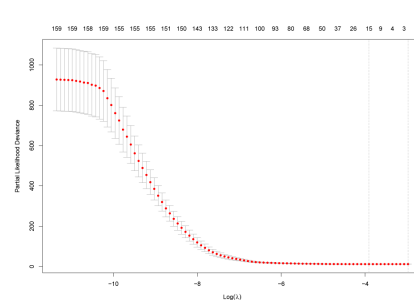

Output:

ACTG2 BGN C1QA  
 CAV1 CHI3L1 COL12A1  
 CYBB DKK3 MMP1  
 NOTCH3 PDGFRA SERPINE1  
 SPP1 STAB1 TUBA1A

Figure S1 **Screening for targeted genes.** **A** DEG analysis between low and high immune scores. **B** DEG analysis between low and high stromal scores. **C** WGCNA analysis for identifying gene modules. **D** Correlation between immune, stromal and ESTIMATE scores and gene modules. \* $P < 0.05$ ; \*\* $P < 0.01$ ; \*\*\* $P < 0.001$ . **E** Venn plot displays the number of immune-related genes between DEG analysis and WGCNA. **F** Venn plot displays the number of stromal-related genes between DEG analysis and WGCNA. **G** The immune-related genes were further inputted into LASSO analysis. **H** The intersection stromal-related genes were further inputted into LASSO analysis. The Y-axis shows LASSO coefficients and the X-axis is  $-\log(\lambda)$ . And the output genes were in the right rectangle boxes.

**Abbreviations:** DEG, differentially expressed gene); WGCNA, weighted correlation network analysis ; LASSO, Least absolute shrinkage and selection operator

**A**

| Factor    | Univariate Cox analysis |         | Multivariate Cox analysis |         |
|-----------|-------------------------|---------|---------------------------|---------|
|           | HR(95% CI)              | p value | HR(95% CI)                | p value |
| riskscore | 2.545 (1.584-4.090)     | <0.001  | 2.080 (1.313-3.295)       | 0.002   |
| M         | 4.052 (2.593-6.333)     | <0.002  | 1.946 (0.881-4.299)       | 0.1     |
| N         | 1.961 (1.560-2.464)     | <0.003  | 1.340 (0.899-2.000)       | 0.151   |
| T         | 2.411 (1.648-3.527)     | <0.004  | 1.789 (1.120-2.859)       | 0.015   |
| Stage     | 2.046 (1.628-2.571)     | <0.005  | 1.266 (0.711-2.252)       | 0.422   |
| Age       | 1.028 (1.010-1.046)     | 0.002   | 1.036 (1.018-1.054)       | <0.001  |

**B**

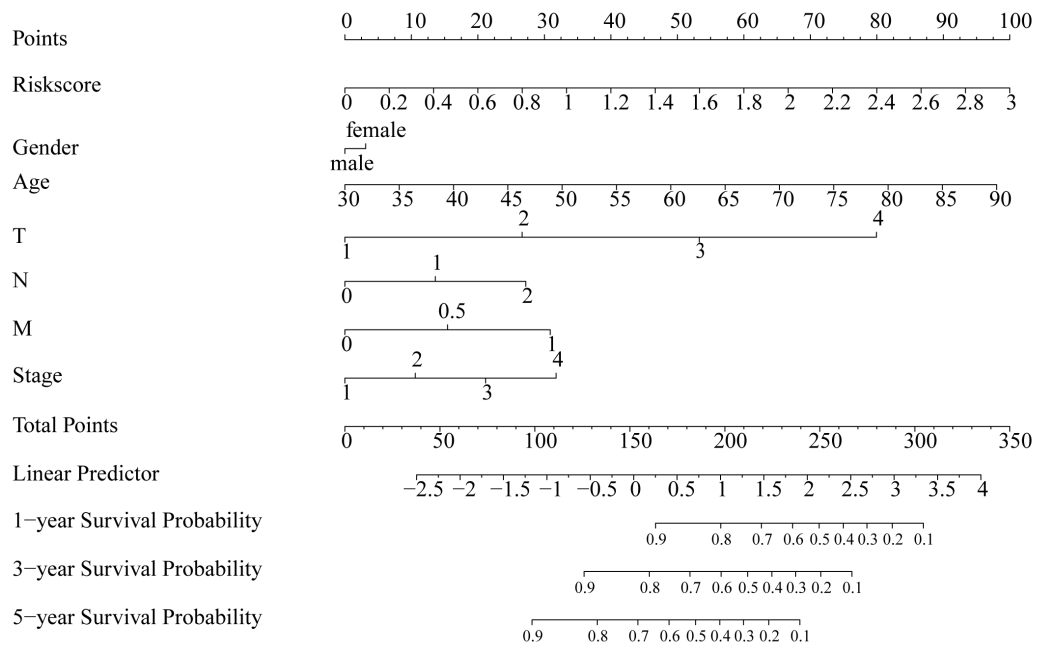

**C**

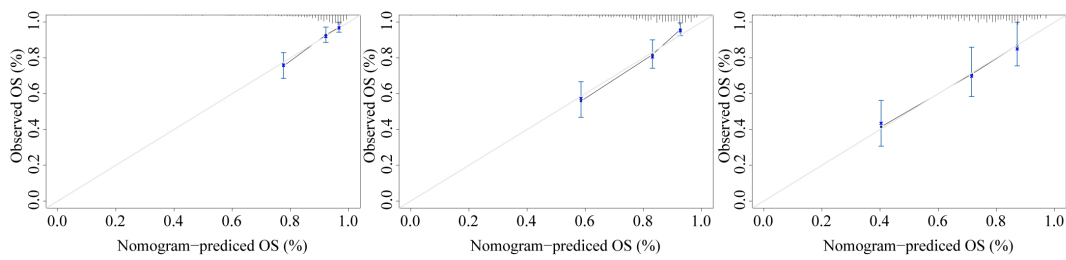

Figure S2 **Prognostic analysis of BST2 in CRC.** **A** Univariate and multivariate Cox regression analysis of riskscore, TNM stage, age and gender. **B** Prognostic nomograms based on risk score, TNM stage, age and gender. **C** Calibration analysis of the nomogram for predicting 1-year, 3-year and 5-year overall survival, respectively.

**A**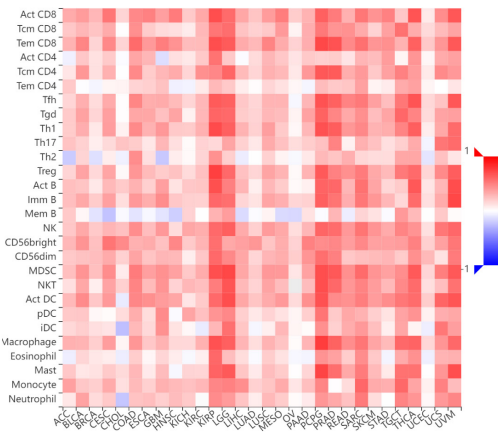**B**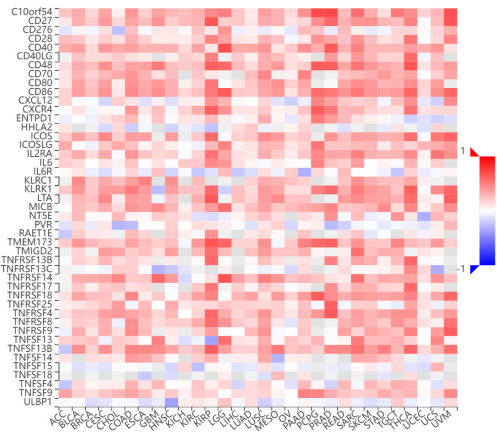**C**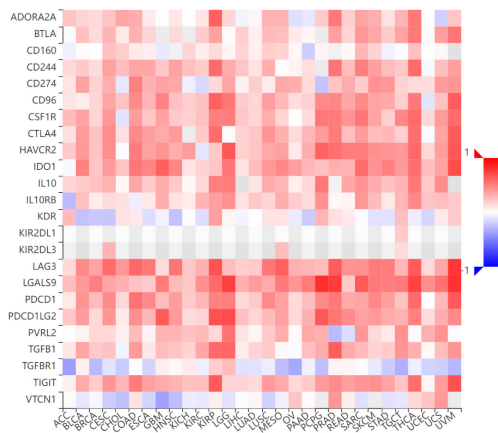**D**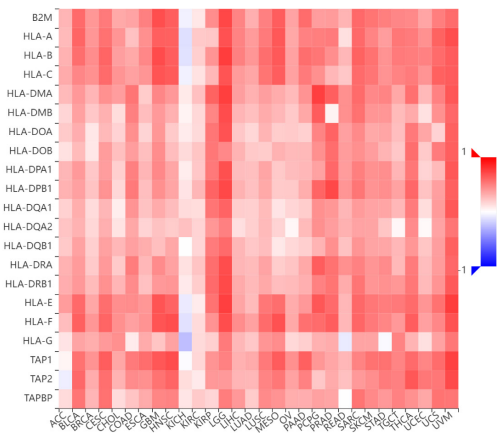

Figure S3 **The correlation analysis between BST2 and various immune factors.** **A** The heatmap showed the correlation between BST2 and immune cells in various cancers. **B** The heatmap showed the correlation between BST2 and immune stimulators in various cancers. **C** The heatmap showed the correlation between BST2 and immune inhibitors in various cancers. **D** The heatmap showed the correlation between BST2 and MHC molecules in various cancers. The plot above were downloaded from <http://cis.hku.hk/TISIDB/>

**A**

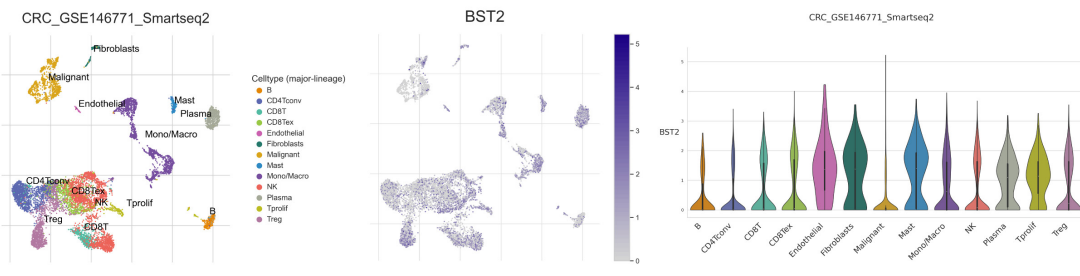

**B**

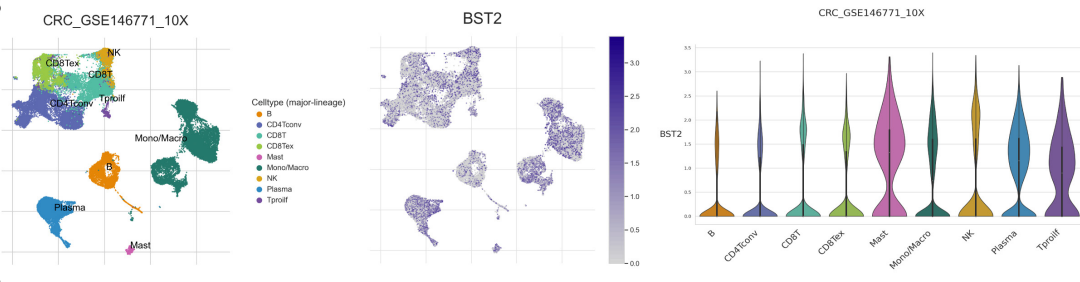

**C**

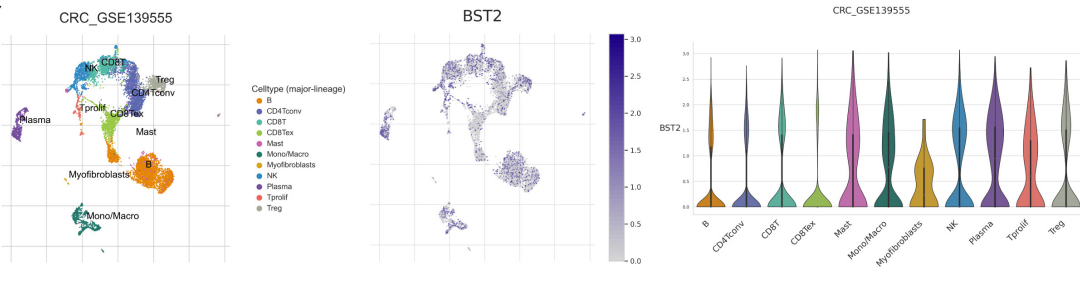

Figure S4 **Distribution of BST2 in different types of immune cells analyzed in three single cell RNA-seq datasets. A** GSE146771; **B** GSE146771; **C** GSE139555; Different colors represent different kinds of immune cells.



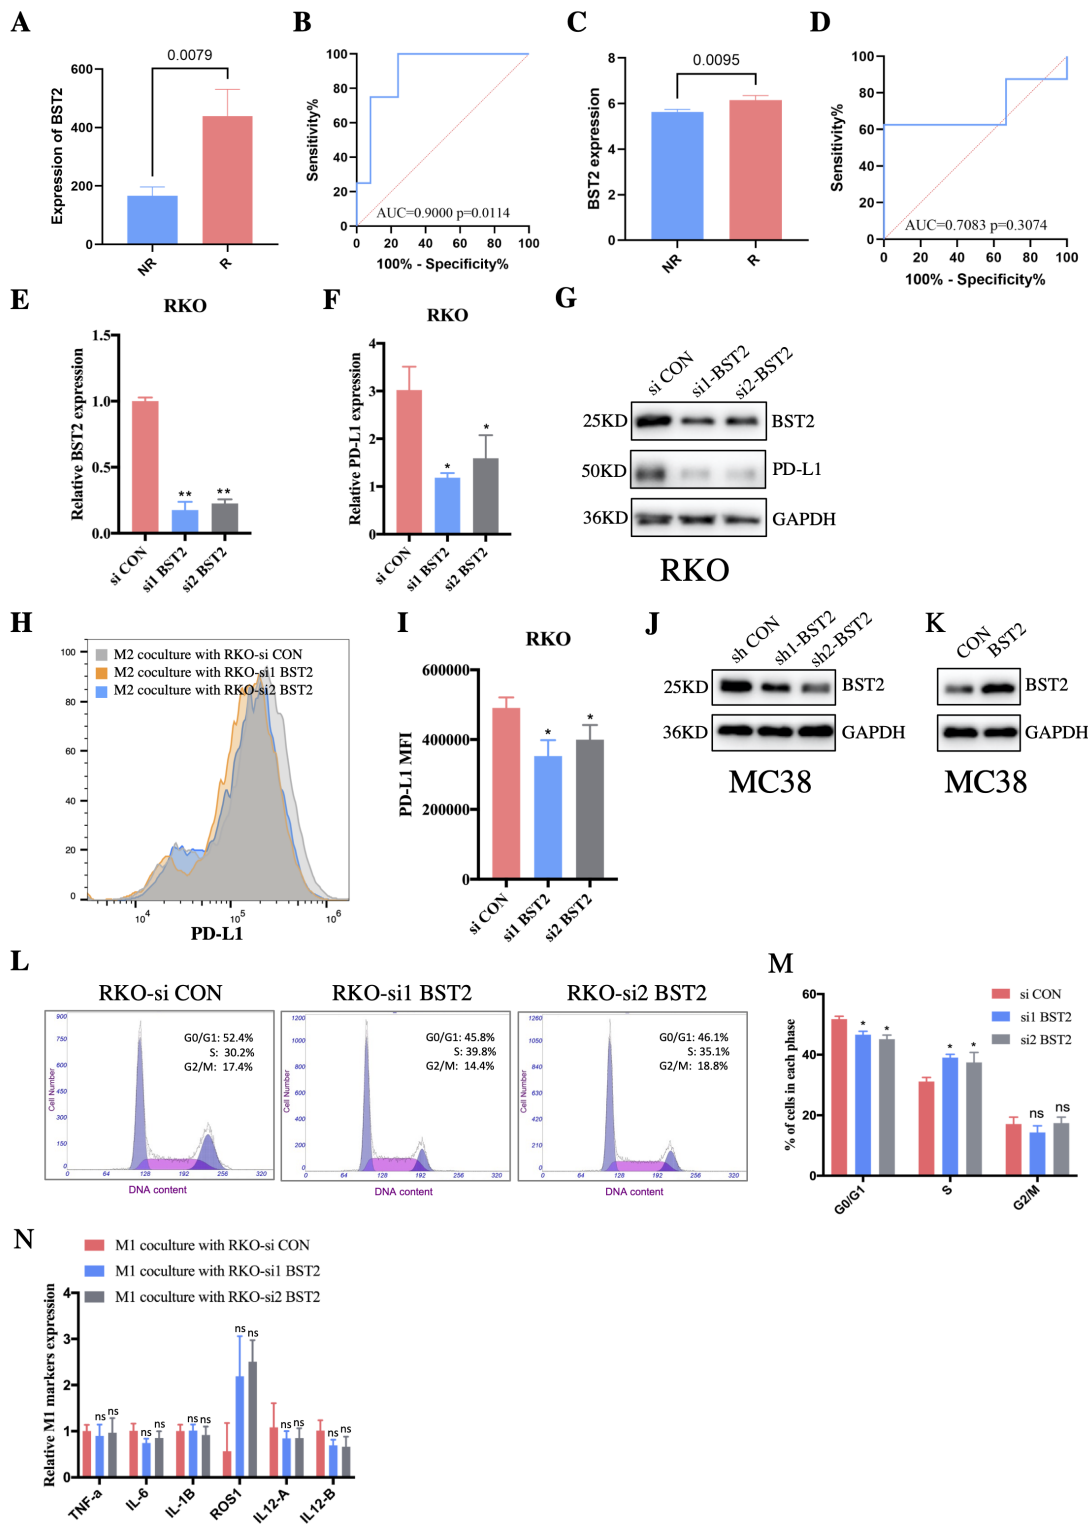

Figure S5 **A** Difference analysis of the distribution of BST2 expression between non-responder and responder prior therapy. **B** ROC analysis of BST2 expression prior therapy in predicting the ICB response. **C** Difference analysis of the distribution of BST2 expression between non-responder and responder post therapy. **D** ROC analysis of BST2 expression post therapy in predicting the ICB response. **E-I** qRT-PCR (E-F), Western blot analysis (G) were used to certificate the knockdown of BST2 in RKO, and the downregulation of PD-L1 in RKO. Flow cytometry analysis to further certificate the downregulation of PD-L1 in RKO (H-I). **J** Western blot analysis was used to certificate knockdown of shRNA-BST2 in RKO. **K** Western blot analysis was used to certificate the overexpression of BST2 in RKO. **L** BST2-knockdown RKO cells were applied to cell cycle analysis assays. **M** The percentage of RKO cells in G0/G1, S and G2/M phases. \*P < 0.05; \*\*P < 0.01; ns, not significant. **N** qRT-PCR analysis was applied to demonstrate the M1 polarization when TAMs cocultured with BST2-knockdown RKO cells.
